# Supplementary material
Source: PubMed Central journal article supplement (PMC6347403)
Supplement: NIHMS1517722-supplement-1.pdf [file NIHMS1517722-supplement-1.pdf]

## Supporting Information

### Effects of Sulfane Sulfur Content in Benzyl Polysulfides on Thiol-Triggered H<sub>2</sub>S Release and Cell Proliferation

Sarah G. Bolton<sup>‡</sup>, Matthew M. Cerda<sup>‡</sup>, Annie K. Gilbert, Michael D. Pluth\*

Contact Information:

Michael D. Pluth

[pluth@uoregon.edu](mailto:pluth@uoregon.edu)

#### Table of Contents

|                                                  | <b>Page</b> |
|--------------------------------------------------|-------------|
| 1. Proposed mechanism of trisulfide formation    | <b>S2</b>   |
| 2. NMR Spectra                                   | <b>S3</b>   |
| 3. MBA Calibration curves                        | <b>S7</b>   |
| 4. Cell Proliferation Assay Experimental Details | <b>S8</b>   |

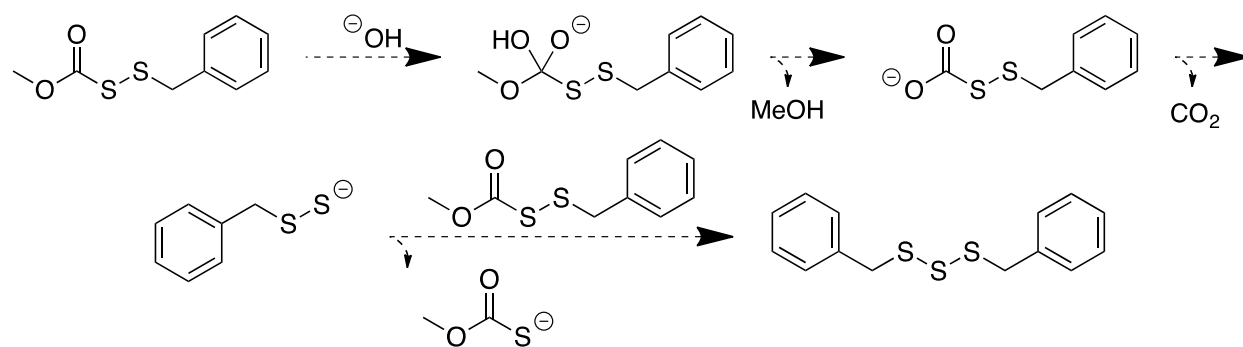

**Scheme S1.** Proposed reaction mechanism for trisulfide synthesis via hydroxide-mediated decomposition of sulfenyl thiocarbonates.

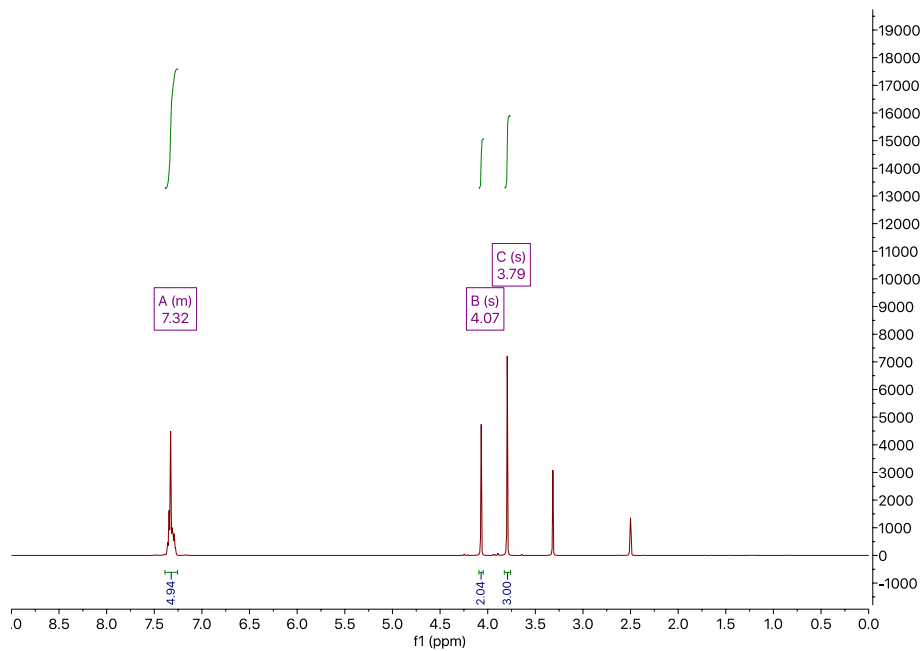

**Figure S1.**  $^1\text{H}$  NMR (500 MHz,  $\text{DMSO-d}_6$ ) spectrum of SS-benzyl *O*-methyl carbonodithioperoxoate)

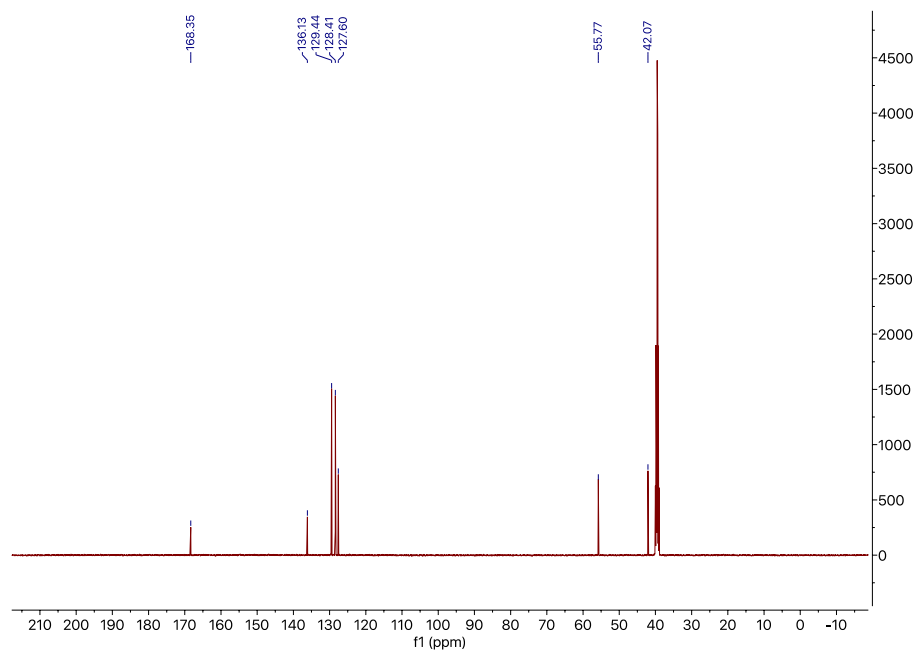

**Figure S2.**  $^{13}\text{C}\{^1\text{H}\}$  NMR (126 MHz,  $\text{DMSO-d}_6$ ) spectrum of SS-benzyl *O*-methyl carbonodithioperoxoate)

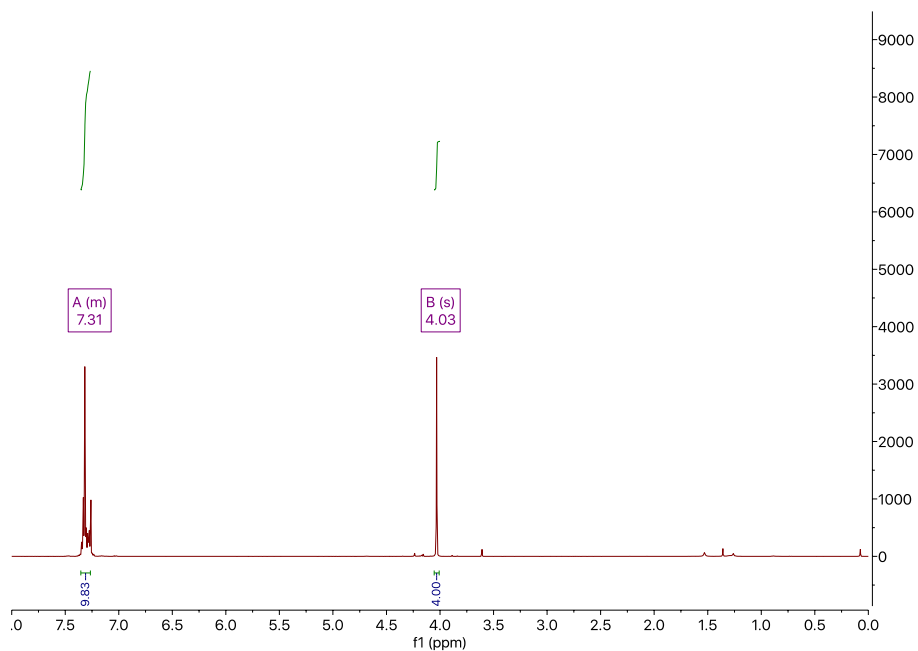

Figure S3.  $^1\text{H}$  NMR (500 MHz,  $\text{CDCl}_3$ ) spectrum of  $\text{Bn}_2\text{S}_3$

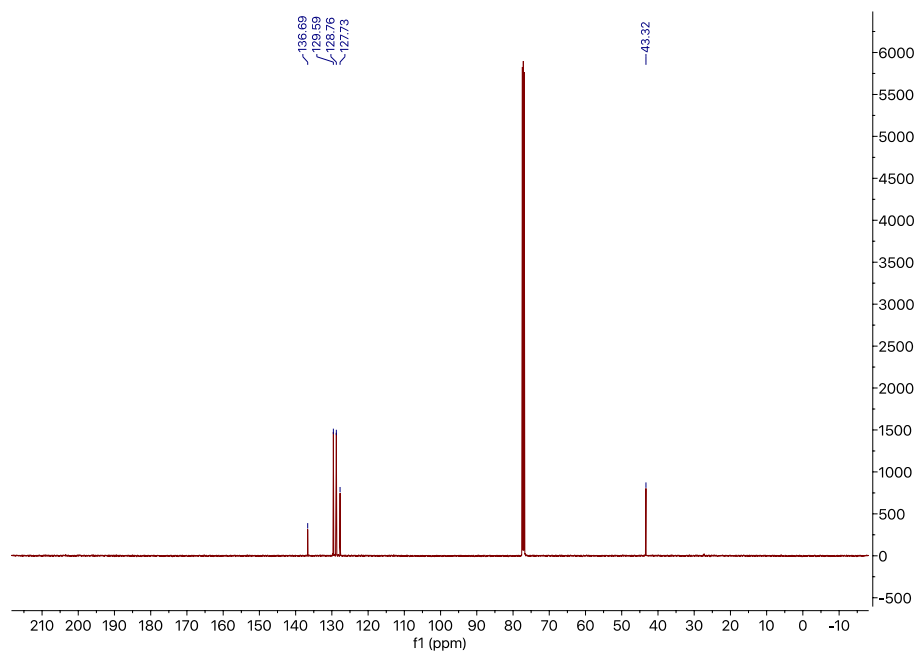

Figure S4.  $^{13}\text{C}\{^1\text{H}\}$  NMR (126 MHz,  $\text{CDCl}_3$ ) spectrum of  $\text{Bn}_2\text{S}_3$

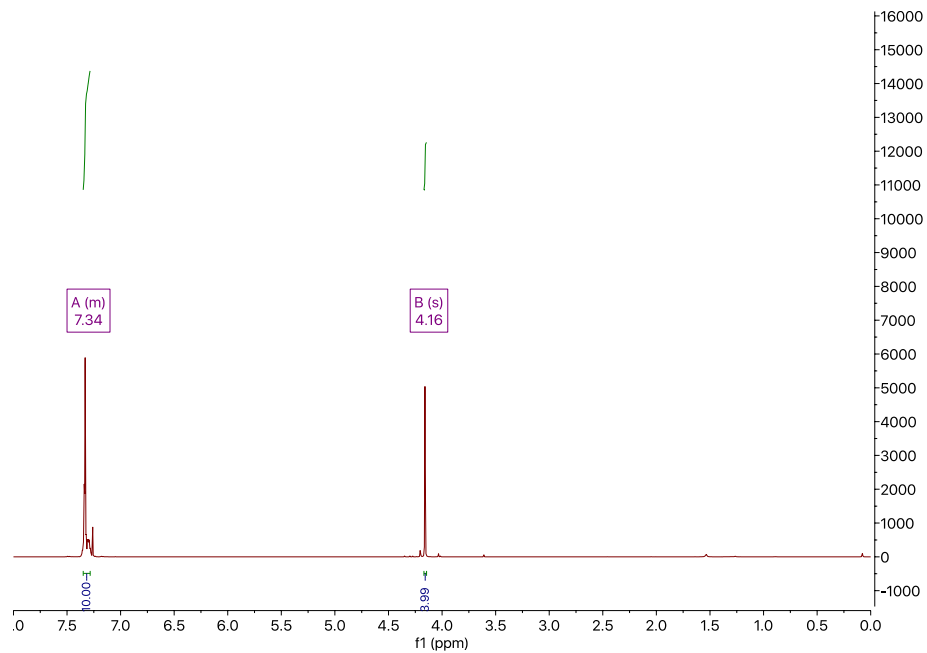

Figure S5.  $^1\text{H}$  NMR (500 MHz,  $\text{CDCl}_3$ ) spectrum of  $\text{Bn}_2\text{S}_4$

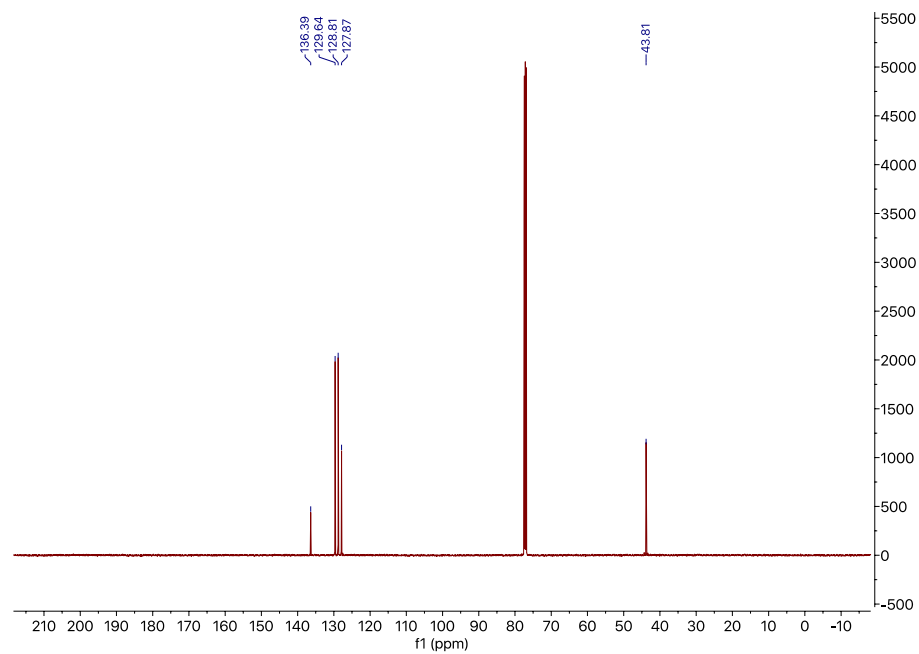

Figure S6.  $^{13}\text{C}\{^1\text{H}\}$  NMR (126 MHz,  $\text{CDCl}_3$ ) spectrum of  $\text{Bn}_2\text{S}_4$

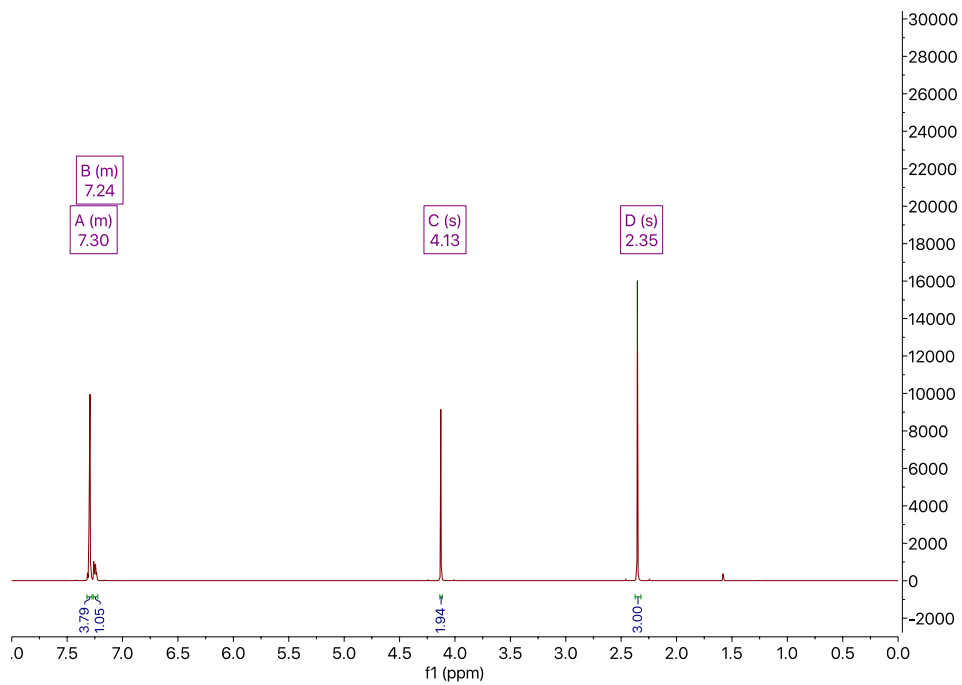

Figure S7.  $^1\text{H}$  NMR (600 MHz,  $\text{CDCl}_3$ ) spectrum of *S*-benzyl ethanethioate

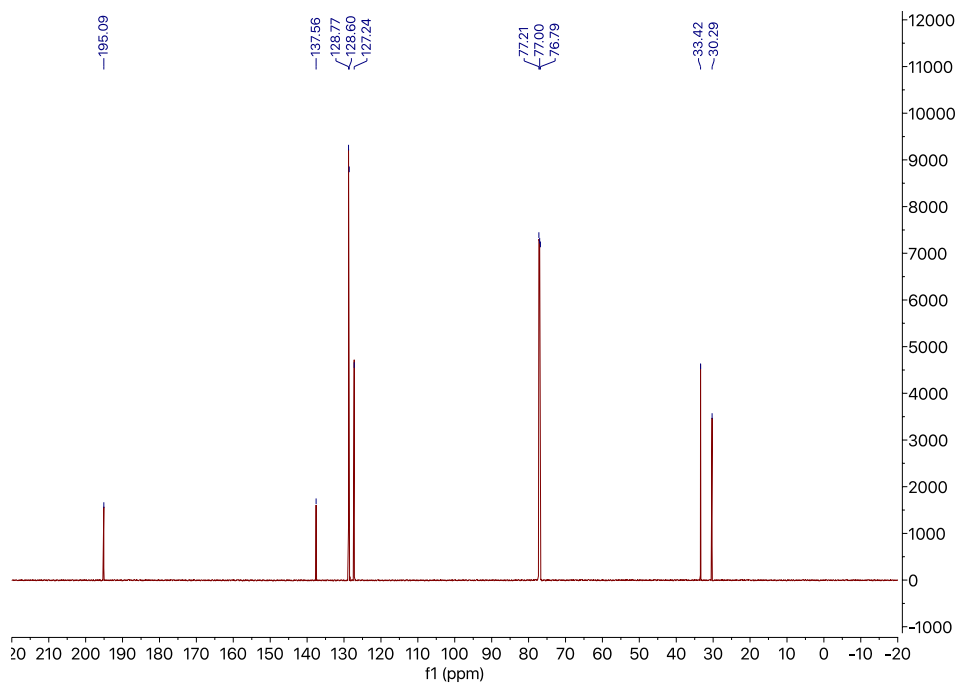

Figure S8.  $^{13}\text{C}$   $\{^1\text{H}\}$  NMR (126 MHz,  $\text{CDCl}_3$ ) spectrum of *S*-benzyl ethanethioate

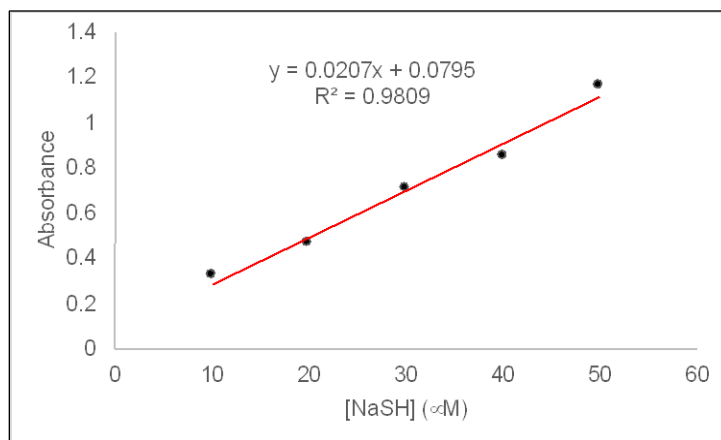

**Figure S9.** MBA calibration curve generated using known concentrations of NaSH in the presence of 500 μM cysteine.

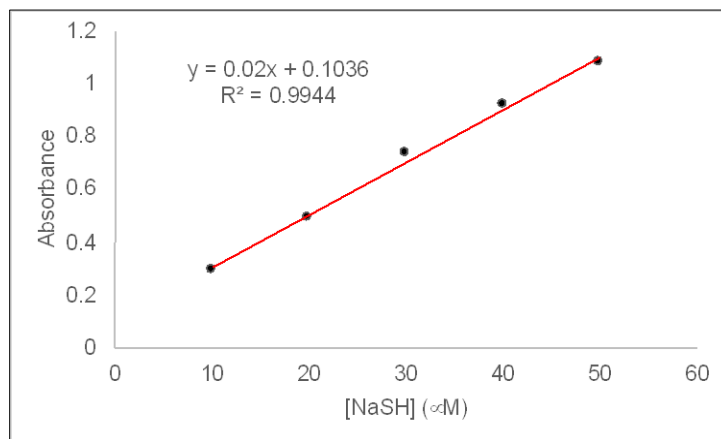

**Figure S10.** MBA calibration curve generated using known concentrations of NaSH in the presence of 500 μM GSH.

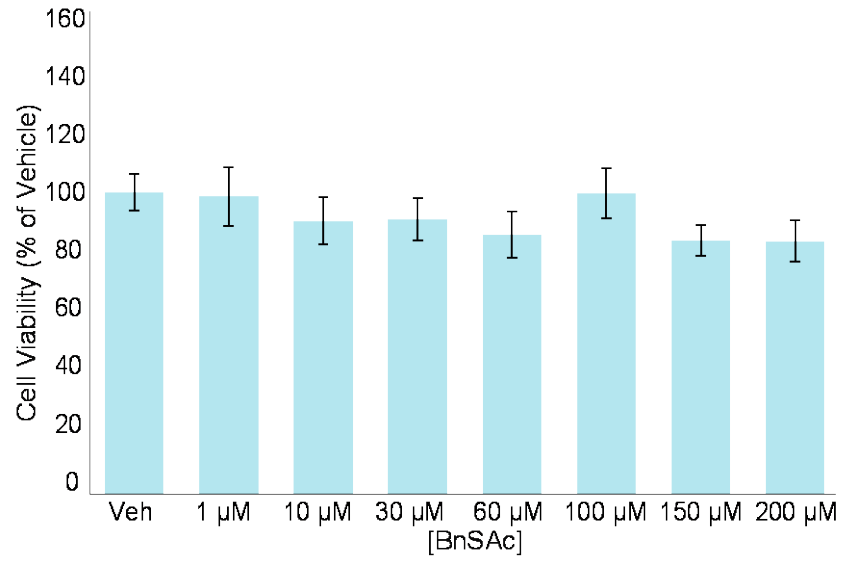

**Figure S11.** Pooled average of cell proliferation data under **BnSAc** treatment. (n=2)

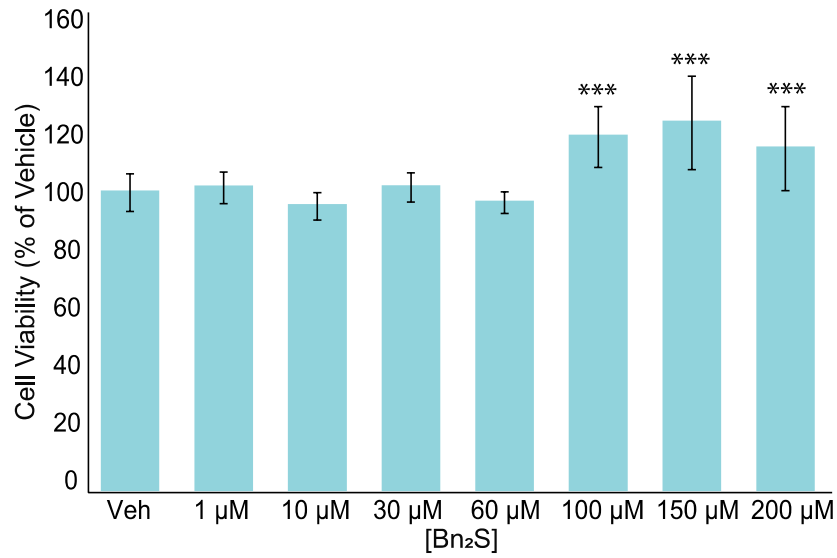

**Figure S12.** Pooled average of cell proliferation data under **Bn<sub>2</sub>S** treatment. (n=4)



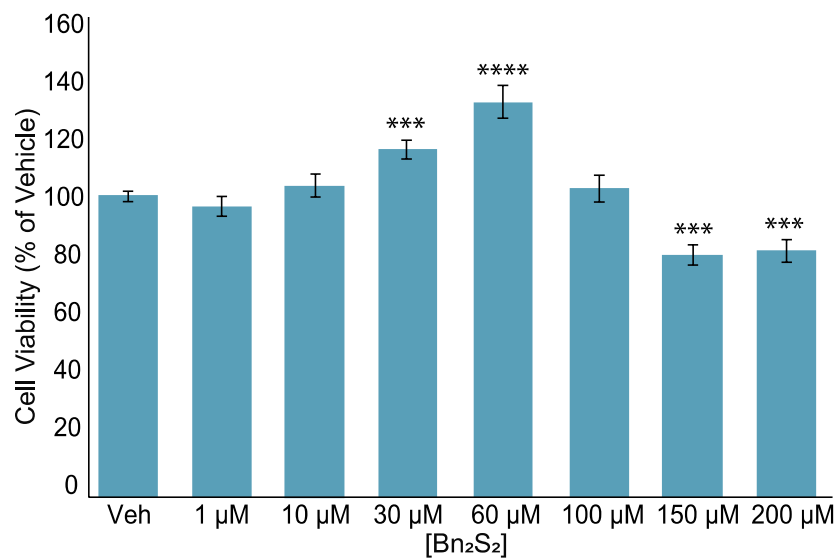

**Figure S13.** Pooled average of cell proliferation data under  $\text{Bn}_2\text{S}_2$  treatment. (n=5)

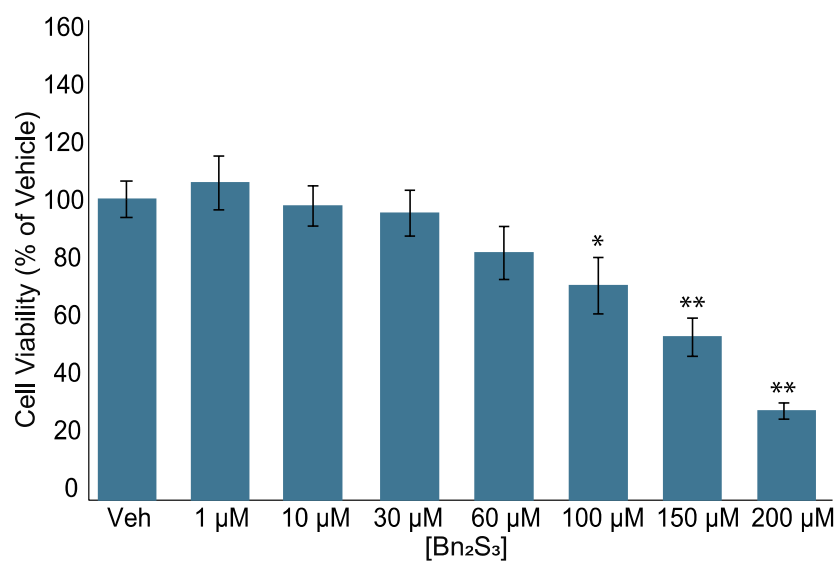

**Figure S14.** Pooled average of cell proliferation data under  $\text{Bn}_2\text{S}_3$  treatment. (n=3)

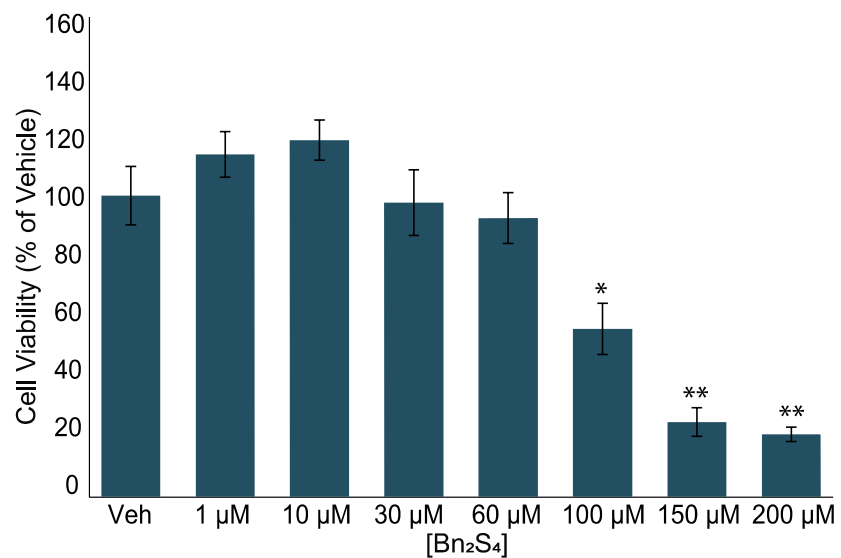

**Figure S15.** Pooled average of cell proliferation data under **Bn<sub>2</sub>S<sub>4</sub>** treatment. (n=3)

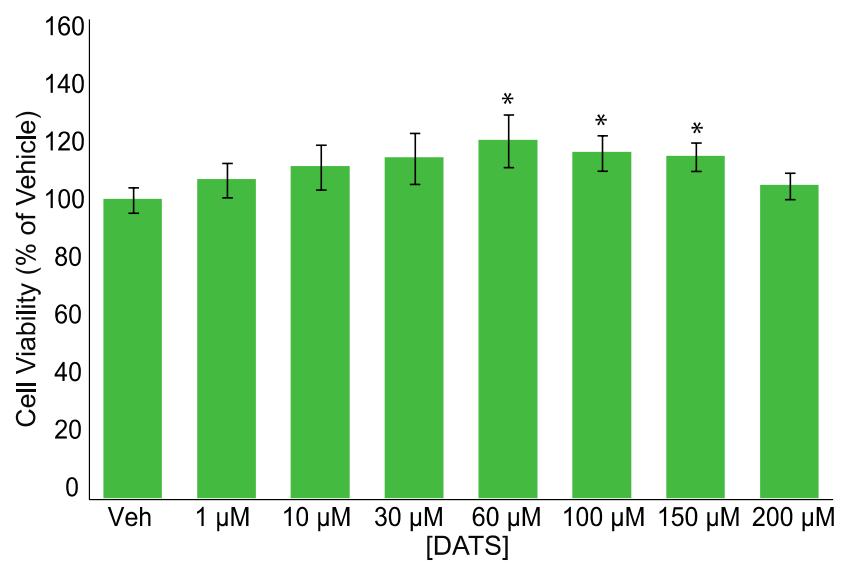

**Figure S16.** Pooled average of cell proliferation data under **DATS** treatment. (n=4)
